# Supplementary material
Source: PubMed Central journal article supplement (PMC6664605)
Supplement: MCB.00101-19-s0001.pdf [file MCB.00101-19-s0001.pdf]

## Supporting Information

# **The poly(C) motifs in the proximal promoter region of D-box binding protein (Dbp) drives its high-amplitude oscillation.**

Paul Kwangho Kwon<sup>1</sup>, Hyo-Min Kim<sup>2</sup>, Sung Wook Kim<sup>2</sup>, Byunghee Kang<sup>2</sup>, Hee Yi<sup>3</sup>, Hyun-Ok Ku<sup>3</sup>, Tae-Young Roh<sup>1,2</sup>, and Kyong-Tai Kim<sup>1,2</sup>

<sup>1</sup>Department of Life Sciences, Pohang University of Science and Technology, Pohang, Gyeongbuk 37673, Republic of Korea.

<sup>2</sup>Division of Integrative Biosciences and Biotechnology, Pohang University of Science and Technology, Pohang, Gyeongbuk 37673, Republic of Korea.

<sup>3</sup>Vet Drugs and Biologics Division, Animal and Plant Quarantine Agency, 177, Hyeoksin 8-ro, Gimcheon-si, Gyeongsangbuk-do 39660, Republic of Korea

\* To whom correspondence should be addressed. Tel: +82 54 279 2297; Fax: +82 54 279 2199; Email: [ktk@postech.ac.kr](mailto:ktk@postech.ac.kr)

### **This PDF file includes:**

Supporting text  
Tables S1 to S3

Table S1. Specific primers for qPCR

|                   |   |                                         |
|-------------------|---|-----------------------------------------|
| Mouse Bmal1       | F | 5'-GCA GTG CCA CTG ACT ACC AAG A-3'     |
|                   | R | 5'-TCC TGG ACA TTG CAT TGC AT-3'        |
| Mouse Per2        | F | 5'-ATGCTCGCCATCCACAAGA-3'               |
|                   | R | 5'-GCGGAATCGAATGGGAGAAT-3'              |
| Mouse Rev-erba    | F | 5'-CTG GAG GGC TGC AGT ATA GC-3'        |
|                   | R | 5'-GTC CAG GGT CGT CAT GTC TT-3'        |
| Mouse Dbp         | F | 5'-AAT GAC CTT TGA ACC TGA TCC CGC T-3' |
|                   | R | 5'-GCT CCA GTA CTT CTC ATC CTT CTG T-3' |
| Mouse Cry1        | F | 5'-TCC GCT GCG TCT ATA TCC TC-3'        |
|                   | R | 5'-ATT TCC CAG GCT TTT CAA GG-3'        |
| Mouse Tbp         | F | 5'-CAG CCT TCC ACC TTA TGC TC-3'        |
|                   | R | 5'-TTG CTG CTG CTG TCT TTG TT-3'        |
| Mouse Ror $\beta$ | F | 5'-GGC AGA CCC ACA CCT ACG A-3'         |
|                   | R | 5'-CAG AGC CTC CCT GGA CTT G-3'         |

Table S2. List of ChIP qPCR primers

|                |   |                                      |
|----------------|---|--------------------------------------|
| Gapdh promoter | F | 5'-GAT TAC GGG ATG GGT CTG AA-3'     |
|                | R | 5'-GCT GCA CCT CTG GTA ACT CC-3'     |
| DBP_pro        | F | 5'-TCC GGT GTT TTG GTT TAG ATT TT-3' |
|                | R | 5'-AGG AGG AGG TGG CAG C-3'          |
| Camk2 $\alpha$ | F | 5'-ATG TTT CCA GGG TCC TCG AG-3'     |
|                | R | 5'-CAA GAC CTG GGA ACG CAA AT-3'     |

Table S3. List of ATAC-qPCR primers

|                |   |                                   |
|----------------|---|-----------------------------------|
| Gapdh promoter | F | 5'-GAT TAC GGG ATG GGT CTG AA-3'  |
|                | R | 5'-GCT GCA CCT CTG GTA ACT CC-3'  |
| Poly(C) region | F | 5'-GTA CCC CTC TTG CCC CAC-3'     |
|                | R | 5'-TGA GGG GCT GAA CTT GTG TA-3'  |
| Dbp_Exon4      | F | 5'-AGA GTA CCG ACT GTT CTT CCG-3' |
|                | R | 5'-GCT TTA TTG TGC CCC TAG TGT-3' |
